# Supplementary material for: Long-term Effectiveness of a Smartphone App Combined With a Smart Band on Weight Loss, Physical Activity, and Caloric Intake in a Population With Overweight and Obesity (Evident 3 Study): Randomized Controlled Trial
Source: PubMed Central journal article supplement (PMC8848250; doi:10.2196/30416), 2022-02-01
Supplement: jmir_v24i2e30416_app1.pdf [file jmir_v24i2e30416_app1.pdf]

**Table S1.** Baseline characteristics comparison between participants who completed the study and those who dropped out

|                                      | <b>Complete</b><br>n = 443 | <b>Loss of follow-up</b><br>n = 207 |                |
|--------------------------------------|----------------------------|-------------------------------------|----------------|
|                                      | Mean                       | Mean                                | <i>P</i> value |
| Age in years, mean (SD)              | 49.2 (9.4)                 | 46.3 (9.9)                          | <.001          |
| <b>Sex , n (%)</b>                   |                            |                                     |                |
| Men                                  | 140 (31.6)                 | 65 (31.4)                           | .96            |
| Women                                | 303 (68.4)                 | 142 (68.6)                          |                |
| <b>Smoker status, n (%)</b>          |                            |                                     |                |
| Non-smoker                           | 181 (40.9)                 | 82 (39.6)                           | .40            |
| Current smoker                       | 91 (20.5)                  | 52 (25.1)                           |                |
| Former smoker                        | 171 (38.6)                 | 73 (35.3)                           |                |
| <b>Clinical variables, mean (SD)</b> |                            |                                     |                |
| Weight, kg                           | 90.2 (14.0)                | 93.3 (16.2)                         | .02            |
| BMI, kg/m <sup>2</sup>               | 32.7 (3.4)                 | 33.6 (3.6)                          | .003           |
| Waist circumference, cm              | 106.7 (10.5)               | 108.8 (14.3)                        | .06            |
| Systolic blood pressure, mmHg        | 119.6 (15.9)               | 119.9 (14.7)                        | .85            |
| Diastolic blood pressure, mmHg       | 80.4 (9.8)                 | 79.5 (9.7)                          | .27            |
| Total Cholesterol, mg/dl             | 200.0 (39.1)               | 199.4 (34.7)                        | .86            |
| HDL Cholesterol, mg/dl               | 51.6 (12.6)                | 51.3 (12.0)                         | .73            |
| <b>BMI classification, n (%)</b>     |                            |                                     |                |
| 27.5-29.9                            | 117 (26.4)                 | 40 (19.3)                           | .05            |
| 30-40                                | 326 (73.6)                 | 167 (80.7)                          |                |
| <b>Chronic diseases, n (%)</b>       |                            |                                     |                |
| Hypertension                         | 144 (32.5)                 | 60 (29.1)                           | .41            |
| Dyslipidaemia                        | 122 (27.5)                 | 38 (19.3)                           | .03            |
| Diabetes Mellitus                    | 5 (1.2)                    | 4 (2.2)                             | .47            |
| <b>Marital status, n (%)</b>         |                            |                                     |                |
| Single                               | 94 (21.2%)                 | 40 (19.3)                           | .11            |
| Married                              | 299 (67.5%)                | 145 (70.0)                          |                |
| Separated                            | 39 (8.8%)                  | 22 (10.6)                           |                |
| Widower                              | 11 (2.5%)                  | 0 (0.0)                             |                |
| <b>Employment status, n (%)</b>      |                            |                                     |                |
| Works outside of home                | 322 (72.7)                 | 159 (76.8)                          | .68            |
| Homemaker                            | 32 (7.2)                   | 11 (5.3)                            |                |
| Retired                              | 30 (6.8)                   | 11 (5.3)                            |                |
| Student                              | 11 (2.5)                   | 3 (1.4)                             |                |
| Unemployed                           | 48 (10.8)                  | 23 (11.1)                           |                |
| <b>Educational level, n (%)</b>      |                            |                                     |                |
| University studies                   | 178 (40.4)                 | 78 (37.7)                           | .70            |
| Middle or High school                | 210 (47.6)                 | 100 (48.3)                          |                |
| Elementary school                    | 49.2 (9.4)                 | 46.3 (9.9)                          |                |
