# Supplementary material for: Long-term Effectiveness of a Smartphone App Combined With a Smart Band on Weight Loss, Physical Activity, and Caloric Intake in a Population With Overweight and Obesity (Evident 3 Study): Randomized Controlled Trial
Source: PubMed Central journal article supplement (PMC8848250; doi:10.2196/30416), 2022-02-01

**Figure S1.** Adherence to the smartphone app (number of days with a record in the app).

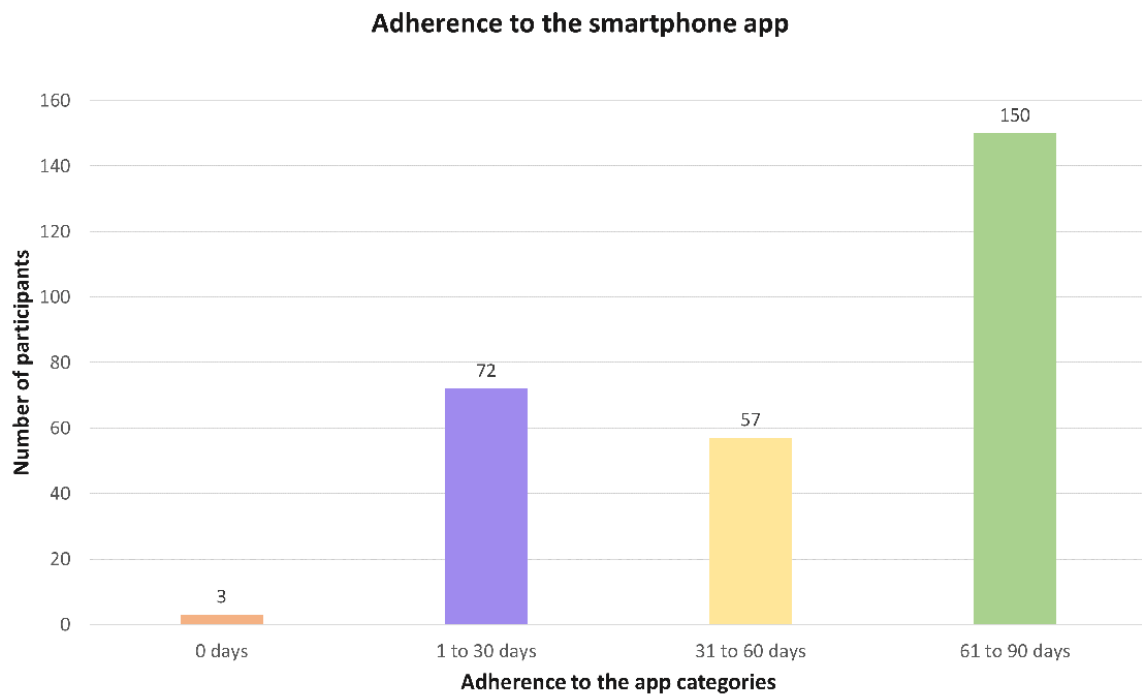

Supplement: jmir_v24i2e30416_app2.pdf [file jmir_v24i2e30416_app2.pdf]
