# Supplementary material for: Long-term Effectiveness of a Smartphone App Combined With a Smart Band on Weight Loss, Physical Activity, and Caloric Intake in a Population With Overweight and Obesity (Evident 3 Study): Randomized Controlled Trial
Source: PubMed Central journal article supplement (PMC8848250; doi:10.2196/30416), 2022-02-01
Supplement: jmir_v24i2e30416_app3.pdf [file jmir_v24i2e30416_app3.pdf]

**Table S2.** Adherence to self-monitoring on the app analyzed by the median percentage out of the 90 days of the intervention grouped by sex, marital status and age

| Intervention group    | Percentage of days of app |                 |
|-----------------------|---------------------------|-----------------|
|                       | use (Median)              | <i>P</i> -value |
| <b>Sex</b>            |                           |                 |
| Women                 | 70.00                     | .38             |
| Men                   | 75.56                     |                 |
| <b>Age</b>            |                           |                 |
| ≤ 50 years            | 57.51                     | .001            |
| > 50 years            | 84.44                     |                 |
| <b>Marital status</b> |                           |                 |
| Single                | 82.22                     | .10             |
| Married               | 73.89                     |                 |
| Divorced              | 43.33                     |                 |
| Widower               | 42.22                     |                 |
