# Supplementary material for: Long-term Effectiveness of a Smartphone App Combined With a Smart Band on Weight Loss, Physical Activity, and Caloric Intake in a Population With Overweight and Obesity (Evident 3 Study): Randomized Controlled Trial
Source: PubMed Central journal article supplement (PMC8848250; doi:10.2196/30416), 2022-02-01
Supplement: jmir_v24i2e30416_app4.pdf [file jmir_v24i2e30416_app4.pdf]

**Table S3.** Correlations between IPAQ-SF and the Smart band at the 3-month visit in the IG

| <i>IPAQ-SF</i>                 | <i>Smart band</i>   |                     |                     |                     |                     |                     |
|--------------------------------|---------------------|---------------------|---------------------|---------------------|---------------------|---------------------|
|                                | <b>Total</b>        |                     | <b>Men</b>          |                     | <b>Women</b>        |                     |
|                                | <b>Steps/day</b>    | <b>Min/day</b>      | <b>Steps/day</b>    | <b>Min/day</b>      | <b>Steps/day</b>    | <b>Min/day</b>      |
| <b>METS/min/week</b>           | 0.372 <sup>b</sup>  | 0.322 <sup>b</sup>  | 0.337 <sup>b</sup>  | 0.302 <sup>b</sup>  | 0.399 <sup>b</sup>  | 0.337 <sup>b</sup>  |
| <b>Min/week/sedentary</b>      | -0.266 <sup>b</sup> | -0.299 <sup>b</sup> | -0.255 <sup>a</sup> | -0.278 <sup>a</sup> | -0.359 <sup>b</sup> | -0.407 <sup>b</sup> |
| <b>Min/week/MVPA</b>           | 0.154 <sup>a</sup>  | 0.145 <sup>a</sup>  | 0.169               | 0.181               | 0.115               | 0.086               |
| <b>Min/week/Total activity</b> | 0.390 <sup>b</sup>  | 0.337 <sup>b</sup>  | 0.375 <sup>b</sup>  | 0.331 <sup>b</sup>  | 0.413 <sup>b</sup>  | 0.355 <sup>b</sup>  |

Abbreviations: Min: Minutes; MVPA: Moderate-vigorous physical activity

<sup>a</sup>Correlation is significant at the  $P = .01$  level (2-tailed).

<sup>b</sup>Correlation is significant at the  $P = .05$  level (2-tailed).
