# Supplementary material for: Long-term Effectiveness of a Smartphone App Combined With a Smart Band on Weight Loss, Physical Activity, and Caloric Intake in a Population With Overweight and Obesity (Evident 3 Study): Randomized Controlled Trial
Source: PubMed Central journal article supplement (PMC8848250; doi:10.2196/30416), 2022-02-01
Supplement: jmir_v24i2e30416_app5.pdf [file jmir_v24i2e30416_app5.pdf]

**Table S4.** Analysis of the mHealth intervention effect on weight and body composition variables grouped by baseline characteristics

| <i>Sex</i>              | Baseline visit<br>(IG) | Baseline visit<br>(CG) | 3-month<br>Net difference | 12-month<br>Net difference | <i>P</i> value |
|-------------------------|------------------------|------------------------|---------------------------|----------------------------|----------------|
|                         | Mean (SD)              | Mean (SD)              | Mean (CI 95%)             | Mean (CI 95%)              |                |
| <b>Men</b>              |                        |                        |                           |                            |                |
| Weight, kg              | 101.5 (15.0)           | 102.0 (12.7)           | 0.25 (-0.88 to 1.39)      | 0.25 (-1.78 to 2.29)       | .86            |
| Waist circumference, cm | 112.9 (15.5)           | 112.5 (8.7)            | -0.74 (-1.88 to 0.41)     | -0.50 (-2.85 to 1.85)      | .57            |
| Hip circumference, cm   | 113.9 (14.0)           | 112.8 (7.6)            | -0.45 (-1.55 to 0.65)     | 0.21 (-1.45 to 1.86)       | .51            |
| BMI, kg/m <sup>2</sup>  | 33.1 (3.7)             | 33.4 (3.3)             | 0.06 (-0.32 to 0.44)      | 0.05 (-0.62 to 0.72)       | .90            |
| Waist height Ratio      | 64.5 (8.1)             | 64.5 (5.0)             | -0.45 (-1.11 to 0.22)     | -0.33 (-1.67 to 1.01)      | .54            |
| Body adiposity index    | 31.2 (5.5)             | 30.9 (3.1)             | -0.22 (-0.70 to 0.27)     | 0.06 (-0.64 to 0.67)       | .52            |
| Waist hip ratio         | 1.0 (0.1)              | 1.0 (0.1)              | 0.00 (-0.01 to 0.01)      | -0.01 (-0.02 to 0.01)      | .78            |
| Body shape index        | 0.1 (0.0)              | 0.1 (0.0)              | 0.00 (0.00 to 0.00)       | 0.00 (0.00 to 0.00)        | .33            |
| Body roundness index    | 6.6 (2.4)              | 6.5 (1.2)              | -0.09 (-0.25 to 0.08)     | -0.06 (-0.40 to 0.27)      | .64            |
| <b>Women</b>            |                        |                        |                           |                            |                |
| Weight, kg              | 86.5 (12.0)            | 86.3 (13.1)            | -1.23 (-1.87 to -0.60)    | -0.50 (-1.53 to 0.54)      | .002           |
| Waist circumference, cm | 104.7 (10.5)           | 105.1 (10.8)           | -0.78 (-1.68 to 0.12)     | -0.47 (-1.75 to 0.81)      | .048           |
| Hip circumference, cm   | 117.6 (9.7)            | 116.7 (9.8)            | -1.29 (-2.11 to -0.47)    | -1.10 (-2.24 to 0.04)      | .02            |
| BMI, kg/m <sup>2</sup>  | 33.1 (3.3)             | 32.8 (3.7)             | -0.48 (-0.73 to -0.22)    | -0.12 (-0.52 to 0.28)      | .003           |
| Waist height Ratio      | 65.0 (6.3)             | 64.9 (5.9)             | -0.51 (-1.07 to 0.06)     | -0.22 (-1.02 to 0.58)      | .05            |
| Body adiposity index    | 39.5 (4.6)             | 38.6 (4.7)             | -0.63 (-1.04 to -0.23)    | -0.52 (-1.08 to 0.04)      | .02            |
| Waist hip ratio         | 0.9 (0.1)              | 0.9 (0.1)              | 0.00 (0.00 to 0.01)       | 0.00 (-0.01 to 0.01)       | .31            |
| Body shape index        | 0.1 (0.0)              | 0.1 (0.0)              | 0.00 (0.00 to 0.00)       | 0.00 (0.00 to 0.00)        | .91            |
| Body roundness index    | 6.7 (1.6)              | 6.6 (1.5)              | -0.12 (-0.25 to 0.02)     | -0.04 (-0.24 to 0.15)      | .07            |
| <b>Age</b>              |                        |                        |                           |                            |                |
| <b>&lt; 50 age</b>      |                        |                        |                           |                            |                |
| Weight, kg              | 93.0 (16.0)            | 94.3 (15.4)            | -0.33 (-1.13 to 0.47)     | -0.34 (-1.75 to 1.07)      | .51            |
| Waist circumference, cm | 107.3 (14.8)           | 108.0 (11.7)           | -0.90 (-1.91 to 0.11)     | -1.04 (-2.72 to 0.65)      | .10            |
| Hip circumference, cm   | 117.1 (12.3)           | 117.6 (9.7)            | -1.23 (-2.19 to -0.26)    | -0.99 (-2.32 to 0.35)      | .03            |
| BMI, kg/m <sup>2</sup>  | 33.2 (3.5)             | 33.6 (3.7)             | -0.17 (-0.47 to 0.14)     | -0.11 (-0.61 to 0.39)      | .43            |
| Waist height Ratio      | 64.3 (7.5)             | 64.6 (6.2)             | -0.59 (-1.21 to 0.03)     | -0.62 (-1.64 to 0.39)      | .09            |
| Body adiposity index    | 36.6 (6.1)             | 36.7 (5.9)             | -0.60 (-1.67 to -0.14)    | -0.48 (-1.10 to 0.14)      | .03            |
| Waist hip ratio         | 0.9 (0.1)              | 0.9 (0.1)              | 0.00 (-0.01 to 0.01)      | 0.00 (-0.01 to 0.01)       | .75            |
| Body shape index        | 0.1 (0.0)              | 0.1 (0.0)              | 0.00 (0.00 to 0.00)       | 0.00 (0.00 to 0.00)        | .14            |
| Body roundness index    | 6.5 (2.1)              | 6.6 (1.5)              | -0.12 (-0.27 to 0.03)     | -0.13 (-0.39 to 0.12)      | .15            |
| <b>&gt; 50 age</b>      |                        |                        |                           |                            |                |
| Weight, kg              | 89.4 (12.9)            | 87.7 (13.4)            | -1.26 (-2.07 to -0.46)    | -0.13 (-1.45 to 1.18)      | .01            |
| Waist circumference, cm | 107.6 (10.1)           | 106.8 (9.6)            | -0.60 (-1.62 to 0.42)     | 0.20 (-1.35 to 1.74)       | .22            |
| Hip circumference, cm   | 115.4 (10.1)           | 113.4 (8.5)            | -0.77 (-1.68 to 0.14)     | -0.30 (-1.61 to 1.01)      | .49            |
| BMI, kg/m <sup>2</sup>  | 33.0 (3.4)             | 32.3 (3.3)             | -0.46 (-0.77 to -0.16)    | -0.01 (-0.48 to 0.47)      | .008           |

|                      |            |            |                       |                       |     |
|----------------------|------------|------------|-----------------------|-----------------------|-----|
| Waist height Ratio   | 65.5 (6.1) | 64.9 (5.1) | -0.36 (-0.99 to 0.26) | 0.19 (-0.75 to 1.12)  | .19 |
| Body adiposity index | 36.9 (6.3) | 39.9 (5.2) | -0.37 (-0.80 to 0.06) | -0.15 (-0.77 to 0.48) | .49 |
| Waist hip ratio      | 0.9 (0.1)  | 0.9 (0.1)  | 0.00 (-0.01 to 0.01)  | 0.00 (-0.01 to 0.02)  | .57 |
| Body shape index     | 0.1 (0.0)  | 0.1 (0.0)  | 0.00 (0.00 to 0.00)   | 0.00 (0.00 to 0.00)   | .88 |
| Body roundness index | 6.8 (1.5)  | 6.6 (1.3)  | -0.09 (-0.24 to 0.07) | 0.05 (-0.17 to 0.28)  | .20 |

---

**Marital status**

---

**Single**

|                         |              |              |                       |                       |      |
|-------------------------|--------------|--------------|-----------------------|-----------------------|------|
| Weight, kg              | 90.1 (14.2)  | 93.0 (18.1)  | 0.04 (-1.25 to 1.33)  | 0.75 (-1.64 to 3.14)  | .32  |
| Waist circumference, cm | 104.9 (11.0) | 109.5 (13.4) | 0.94 (-0.95 to 2.83)  | 0.78 (-2.26 to 3.82)  | .58  |
| Hip circumference, cm   | 116.0 (8.9)  | 117.7 (10.4) | -0.57 (-2.10 to 0.96) | -0.51 (-2.80 to 1.77) | .74  |
| BMI, kg/m <sup>2</sup>  | 32.7 (3.5)   | 33.3 (3.9)   | -0.02 (-0.58 to 0.55) | 0.40 (-0.48 to 1.28)  | .27  |
| Waist height Ratio      | 63.4 (6.4)   | 65.8 (6.4)   | 0.51 (-0.68 to 1.71)  | 0.55 (-1.30 to 2.40)  | .54  |
| Body adiposity index    | 36.7 (5.5)   | 37.0 (5.2)   | -0.31 (-1.05 to 0.42) | -0.26 (-1.33 to 0.81) | .72  |
| Waist hip ratio         | 0.9 (0.1)    | 0.9 (0.1)    | 0.01 (0.00 to 0.03)   | 0.01 (-0.02 to 0.04)  | .42  |
| Body shape index        | 0.1 (0.0)    | 0.1 (0.0)    | 0.00 (0.00 to 0.00)   | 0.00 (0.00 to 0.00)   | .92  |
| Body roundness index    | 6.3 (1.6)    | 6.9 (1.6)    | 0.14 (-0.14 to 0.43)  | 0.16 (-0.30 to 0.62)  | .497 |

**Married**

|                         |              |             |                        |                        |      |
|-------------------------|--------------|-------------|------------------------|------------------------|------|
| Weight, kg              | 92.2 (15.4)  | 90.4 (13.8) | -1.09 (-1.75 to -0.42) | -0.90 (-2.00 to 0.20)  | .02  |
| Waist circumference, cm | 108.1 (13.7) | 106.8 (9.8) | -1.29 (-2.08 to -0.50) | -1.21 (-2.51 to 0.08)  | .01  |
| Hip circumference, cm   | 116.4 (12.4) | 114.9 (9.1) | -1.27 (-2.06 to -0.48) | -1.16 (-2.24 to -0.07) | .009 |
| BMI, kg/m <sup>2</sup>  | 33.1 (3.4)   | 32.8 (3.5)  | -0.43 (-0.67 to -0.18) | -0.33 (-0.72 to 0.06)  | .01  |
| Waist height Ratio      | 65.0 (7.1)   | 64.5 (5.4)  | -0.81 (-1.29 to -0.33) | -0.72 (-1.50 to 0.06)  | .01  |
| Body adiposity index    | 36.5 (6.4)   | 36.1 (5.6)  | -0.61 (-0.99 to -0.23) | -0.56 (-1.08 to -0.05) | .007 |
| Waist hip ratio         | 0.9 (0.1)    | 0.9 (0.1)   | 0.00 (-0.01 to 0.00)   | 0.00 (-0.01 to 0.01)   | .64  |
| Body shape index        | 0.1 (0.0)    | 0.1 (0.0)   | 0.00 (0.00 to 0.00)    | 0.00 (0.00 to 0.00)    | .34  |
| Body roundness index    | 6.7 (2.0)    | 6.6 (1.3)   | -0.18 (-0.30 to -0.07) | -0.17 (-0.36 to 0.03)  | .02  |

**Others**

|                         |              |             |                       |                      |     |
|-------------------------|--------------|-------------|-----------------------|----------------------|-----|
| Weight, kg              | 89.1 (12.1)  | 90.9 (13.1) | -0.20 (-2.16 to 1.75) | 1.96 (-1.07 to 5.00) | .28 |
| Waist circumference, cm | 107.2 (10.5) | 106.2 (9.2) | -0.76 (-3.14 to 1.61) | 1.57 (-1.81 to 4.95) | .28 |
| Hip circumference, cm   | 116.6 (9.0)  | 115.2 (7.3) | -0.41 (-2.43 to 1.62) | 1.80 (-1.15 to 4.75) | .29 |
| BMI, kg/m <sup>2</sup>  | 33.6 (3.4)   | 32.9 (3.4)  | -0.12 (-0.78 to 0.54) | 0.76 (-0.32 to 1.84) | .17 |
| Waist height Ratio      | 66.0 (6.7)   | 64.0 (5.4)  | -0.46 (-1.89 to 0.97) | 1.02 (-0.99 to 3.04) | .21 |
| Body adiposity index    | 38.4 (6.4)   | 36.1 (6.3)  | -0.18 (-1.14 to 0.78) | 0.92 (-0.46 to 2.31) | .22 |
| Waist hip ratio         | 0.9 (0.1)    | 0.9 (0.1)   | 0.00 (-0.03 to 0.02)  | 0.00 (-0.02 to 0.02) | .44 |
| Body shape index        | 0.1 (0.0)    | 0.1 (0.0)   | 0.00 (0.00 to 0.00)   | 0.00 (0.00 to 0.00)  | .75 |
| Body roundness index    | 6.9 (1.7)    | 6.4 (1.3)   | -0.11 (-0.46 to 0.23) | 0.26 (-0.23 to 0.74) | .18 |

Abbreviations: IG: Intervention group; CG: Control group;
